# Supplementary material for: Reconstitution of selective HIV-1 RNA packaging in vitro by membrane-bound Gag assemblies
Source: eLife journal article supplement (doi:10.7554/elife.14663), 2016-06-25
Supplement: supp [file elife-14663-supp-v1.zip]

Archive with 4 entries (4 files):
- elife_poa_e14663_Figure_1_figure_supplement_1.pdf
- elife_poa_e14663_Figure_5_figure_supplement_1.pdf
- elife_poa_e14663_Figure_5_figure_supplement_2.pdf
- elife_poa_e14663_Figure_4_figure_supplement_1.pdf
