# Supplementary figures and images for: Reconstitution of selective HIV-1 RNA packaging in vitro by membrane-bound Gag assemblies
Source: eLife journal article supplement (doi:10.7554/elife.14663), 2016-06-25

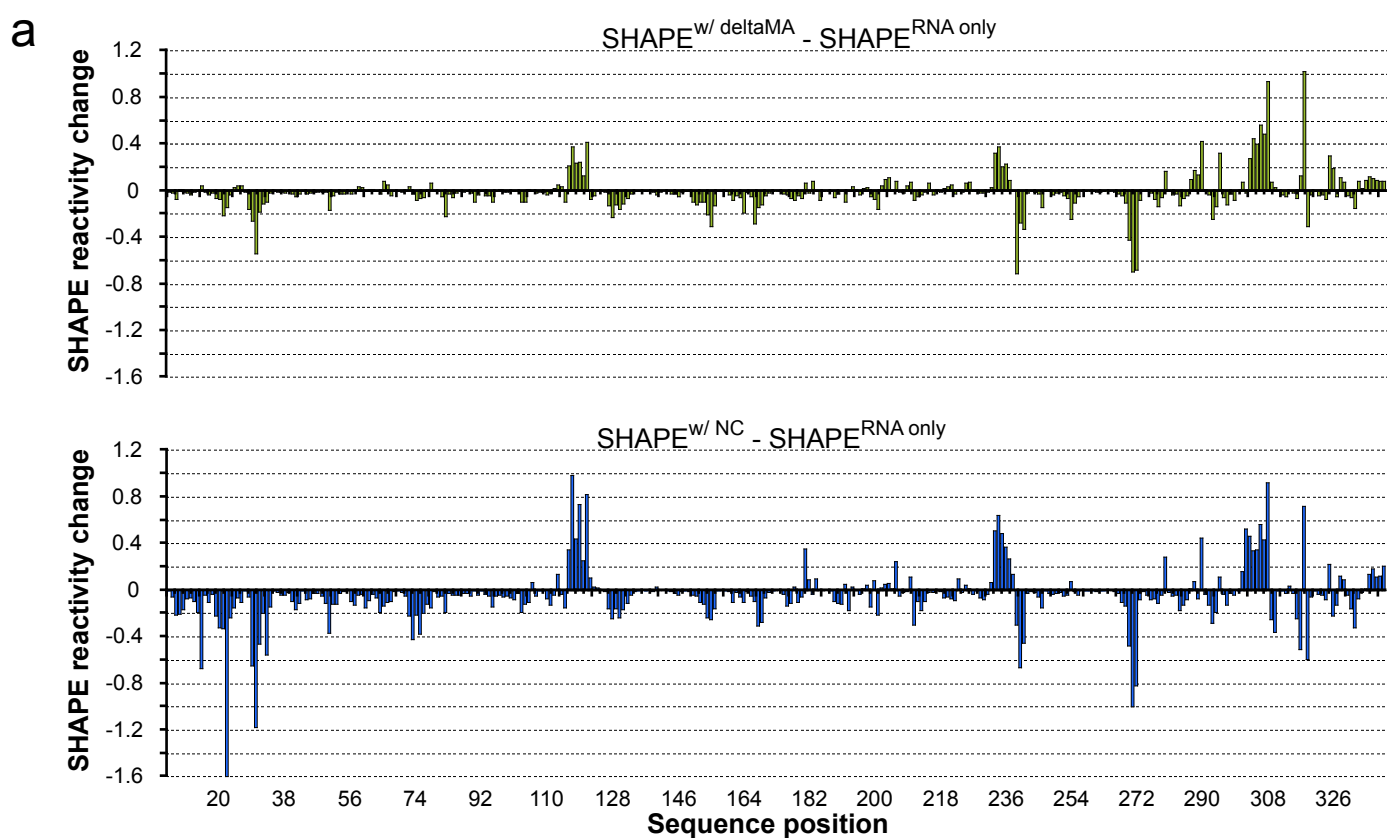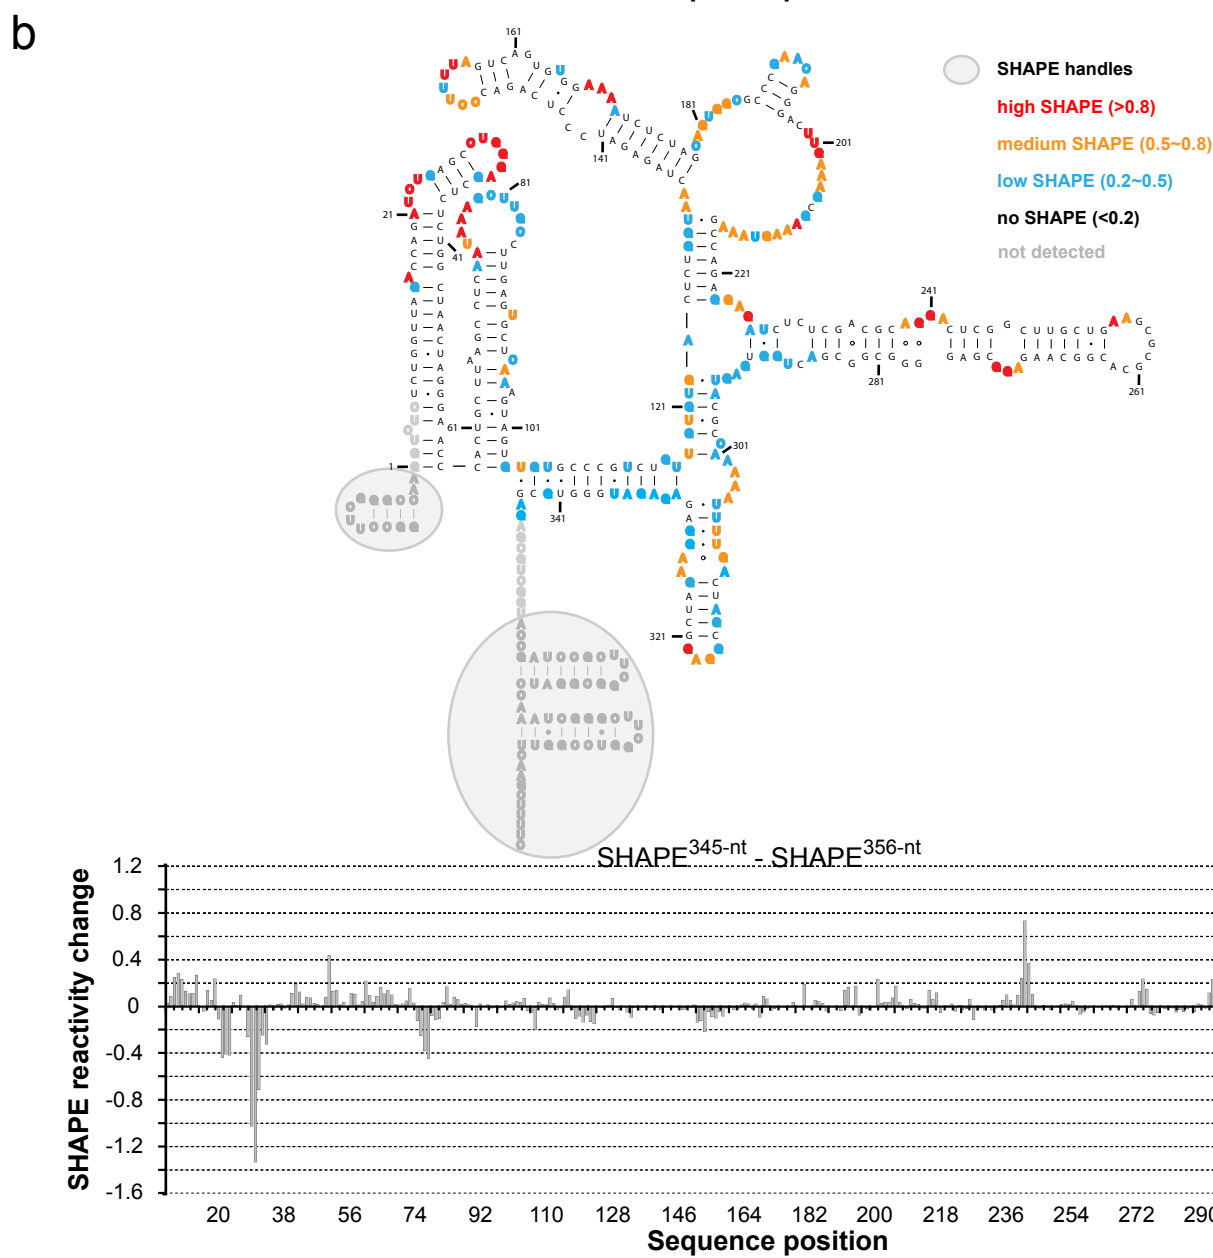

Supplement: supp [file elife-14663-supp-v1.zip]

Figure 4 - figure supplement 1

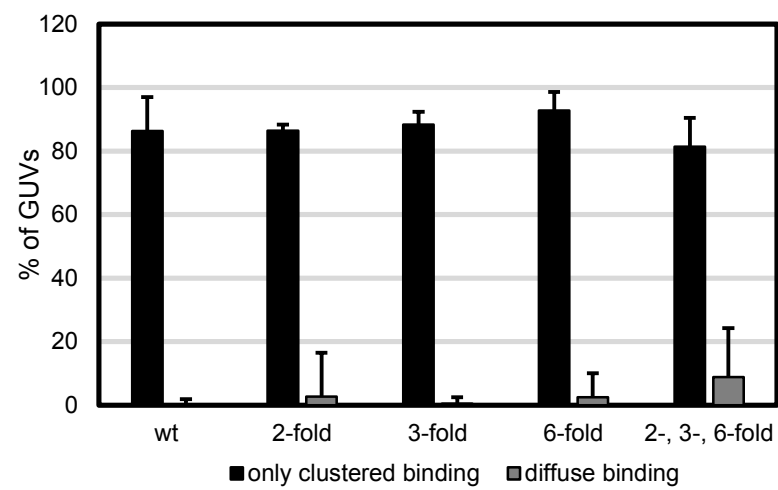

Supplement: supp [file elife-14663-supp-v1.zip]

Figure 1 - figure supplement 1

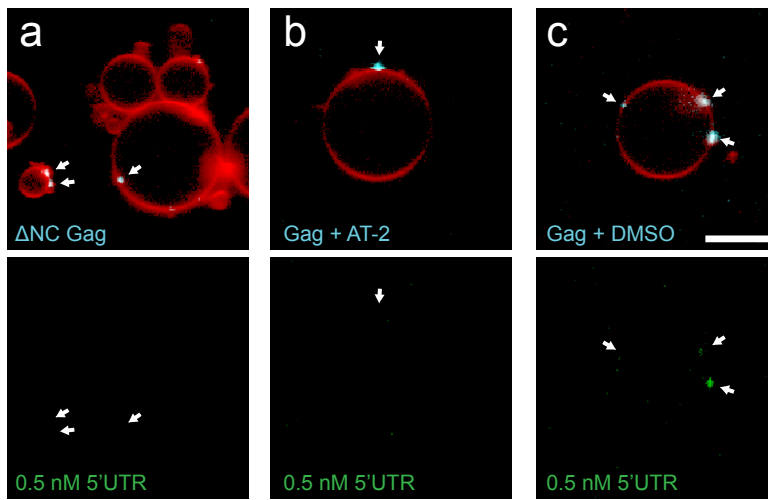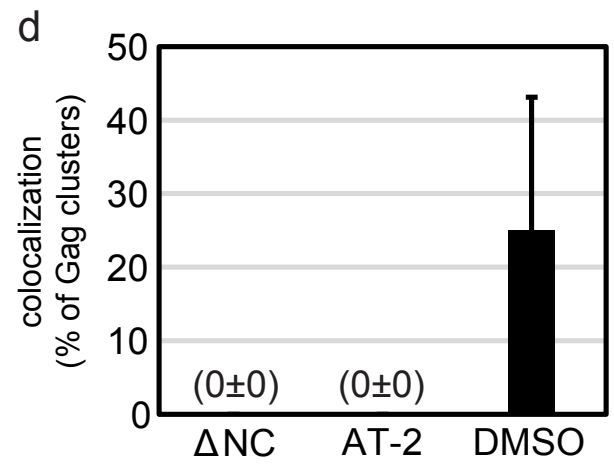

Supplement: supp [file elife-14663-supp-v1.zip › elife_poa_e14663_Figure_1_figure_supplement_1.pdf]

Figure 5 - figure supplement 2

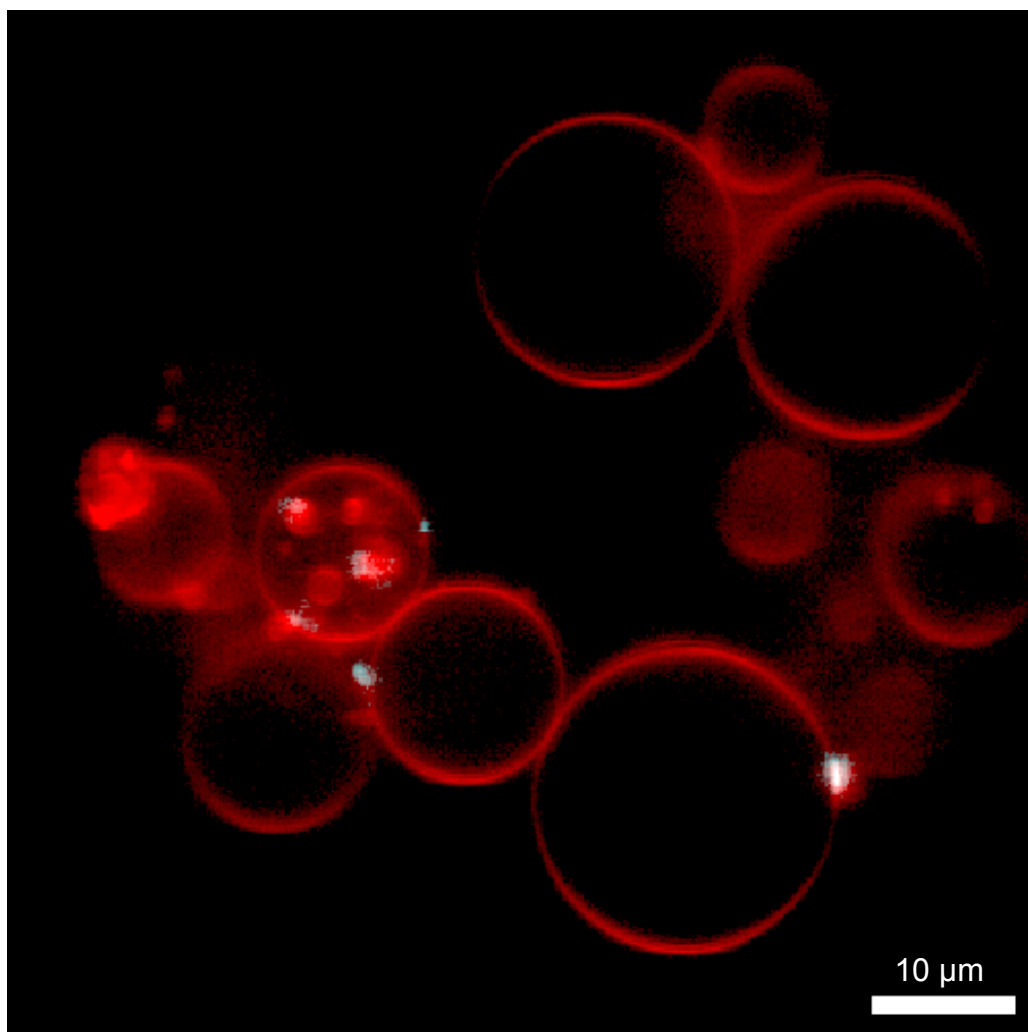

Supplement: supp [file elife-14663-supp-v1.zip › elife_poa_e14663_Figure_5_figure_supplement_2.pdf]
